# Supplementary material
Source: HighWire-hosted journal article supplement (https://www.rcpjournals.org/highwire/filestream/10119/field_highwire_adjunct_files/0/Nana_Supplementary_matrerial_S1_Survey.docx)

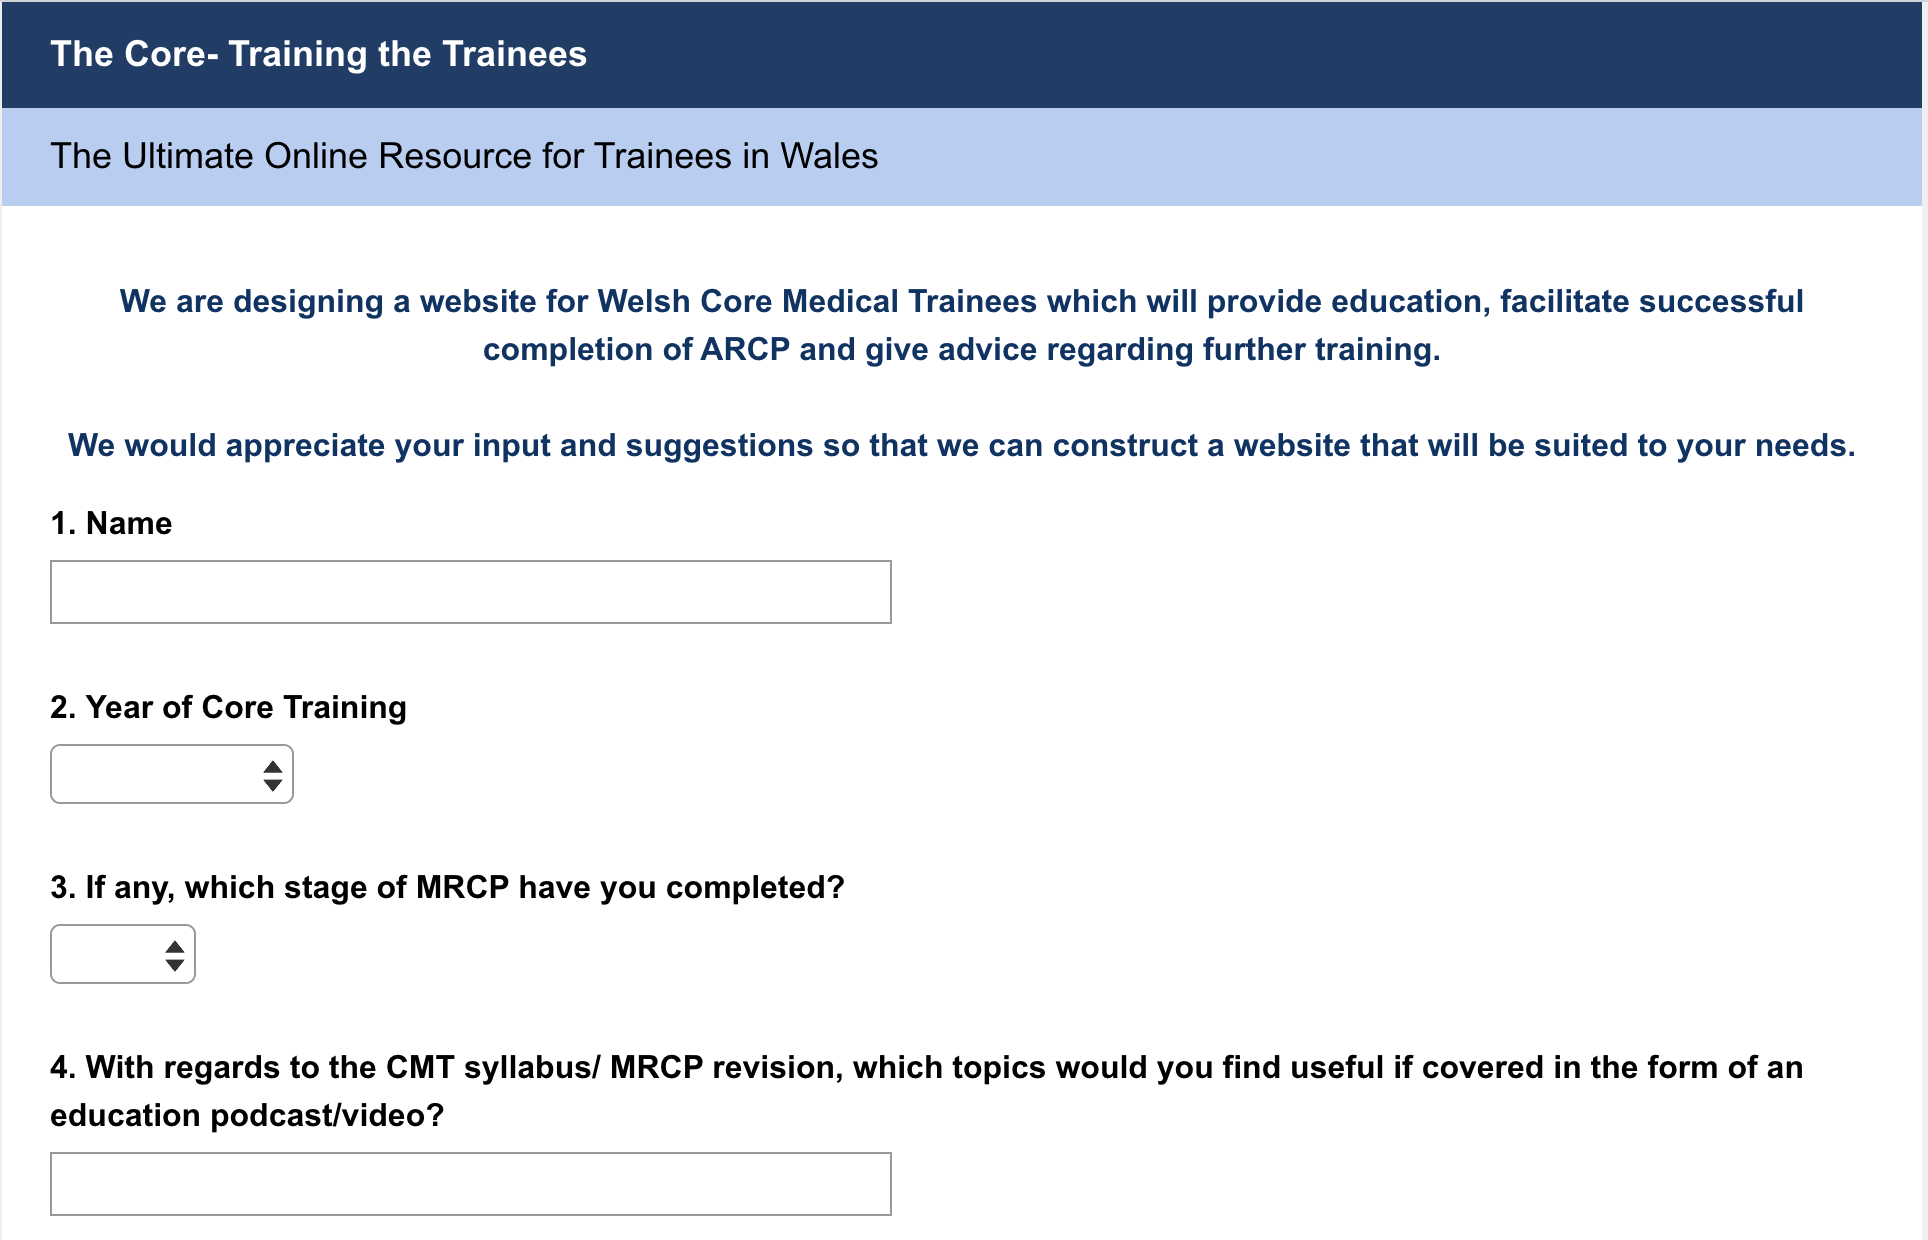

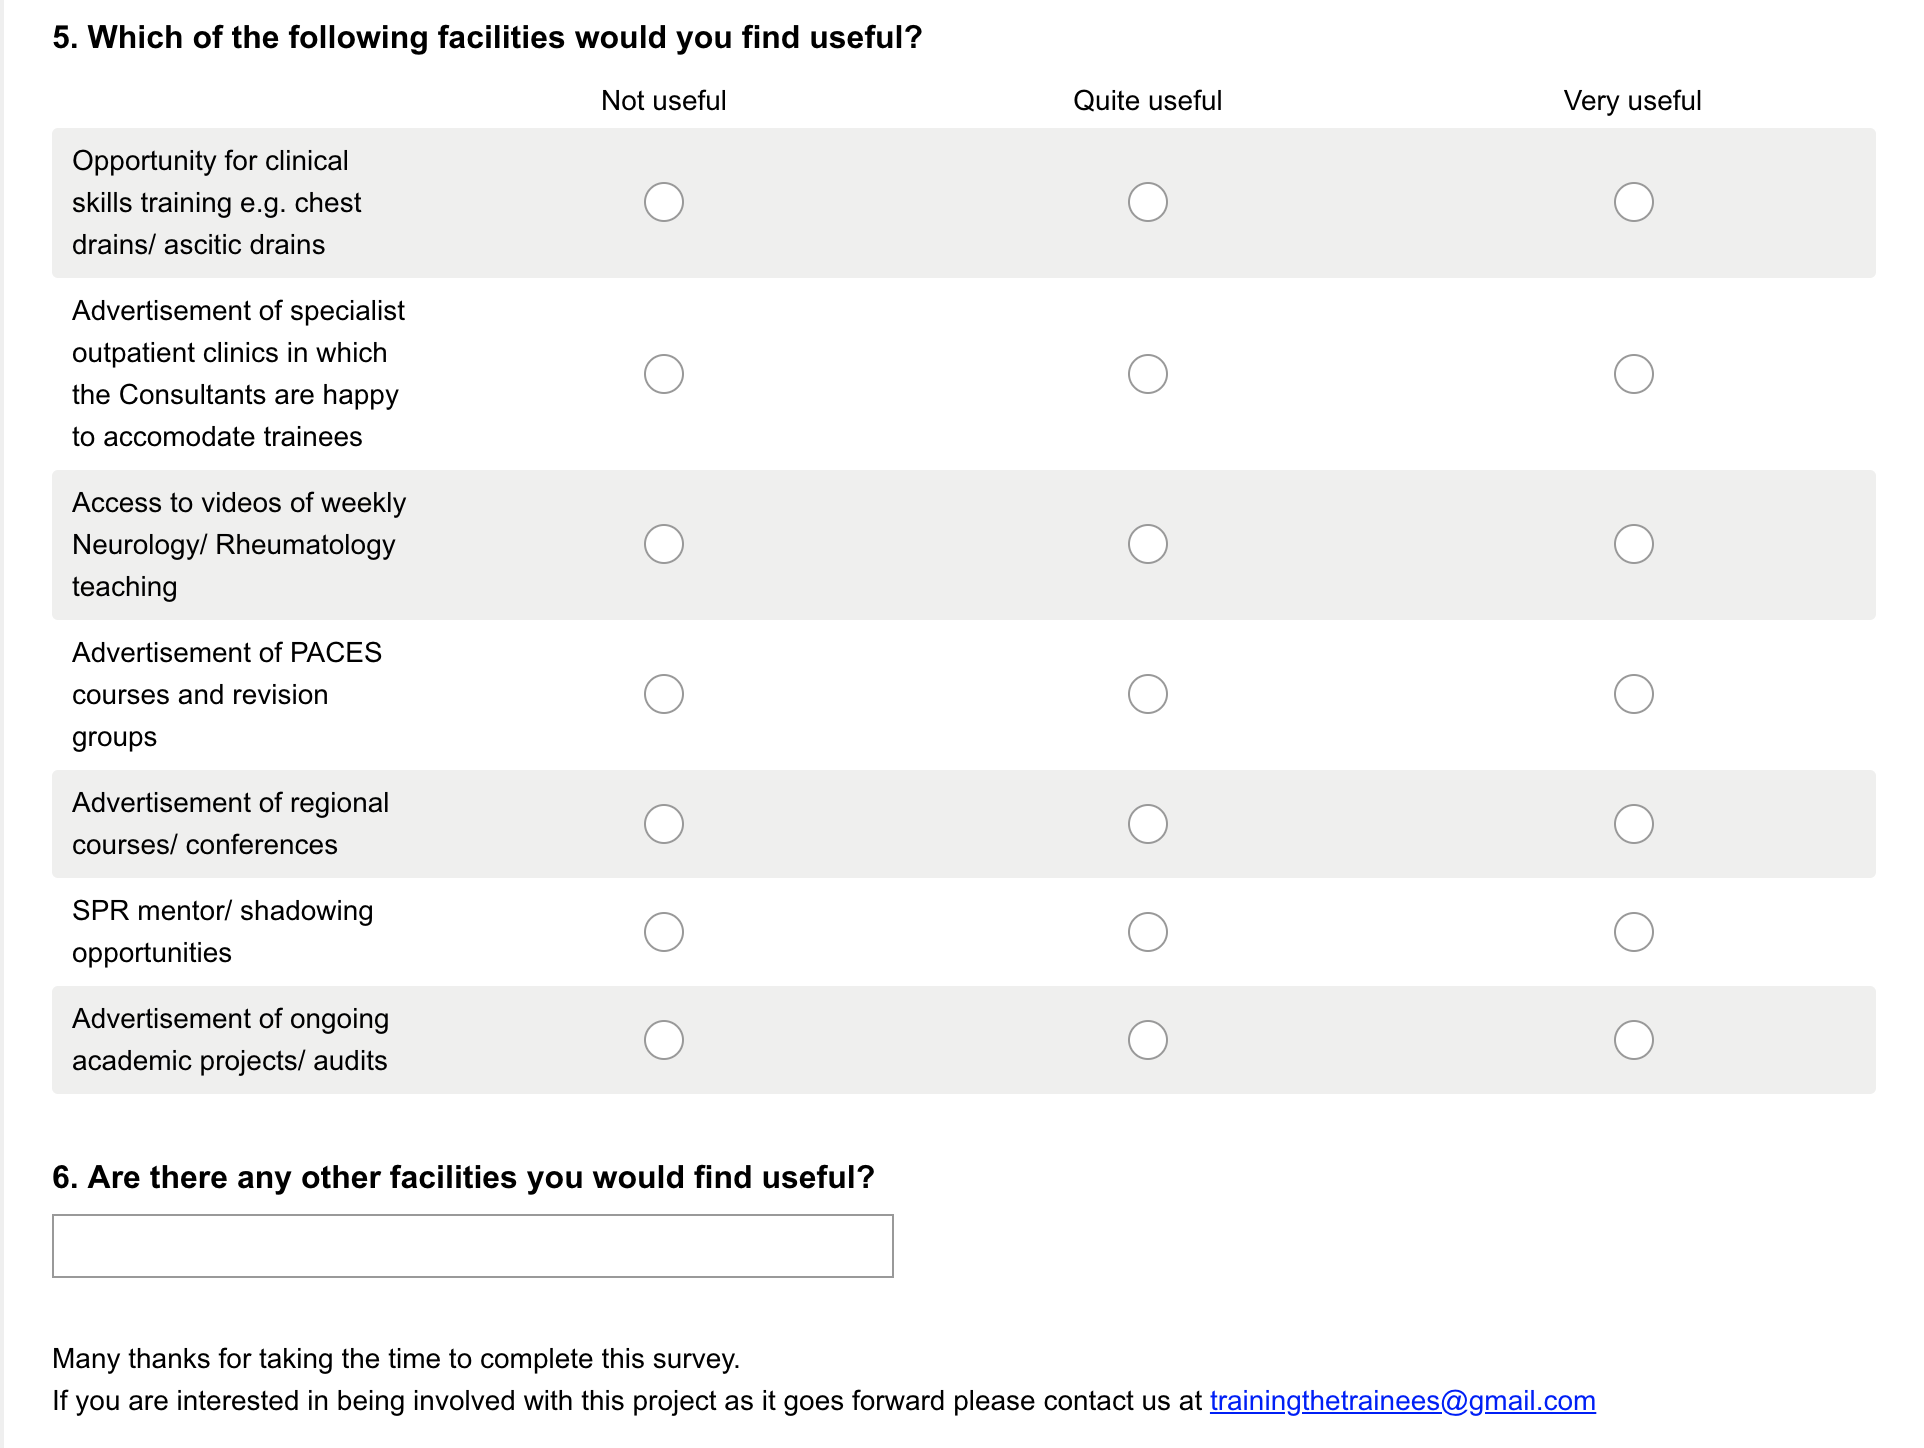

Supplement: Nana_Supplementary_matrerial_S1_Survey.docx [file Nana_Supplementary_matrerial_S1_Survey.docx]
